# Supplementary material
Source: PubMed Central journal article supplement (PMC6202171)
Supplement: NIHMS974566-supplement-Supp__Materials.pdf [file NIHMS974566-supplement-Supp__Materials.pdf]

## Supplement Material

### Inorganic polyphosphate amplifies HMGB1-mediated von Willebrand factor release and platelet string formation on endothelial cells

Indranil Biswas, Sumith R. Panicker, Xiaofeng Cai, Padmaja Mehta-D'souza, and Alireza R Rezaie<sup>1</sup>

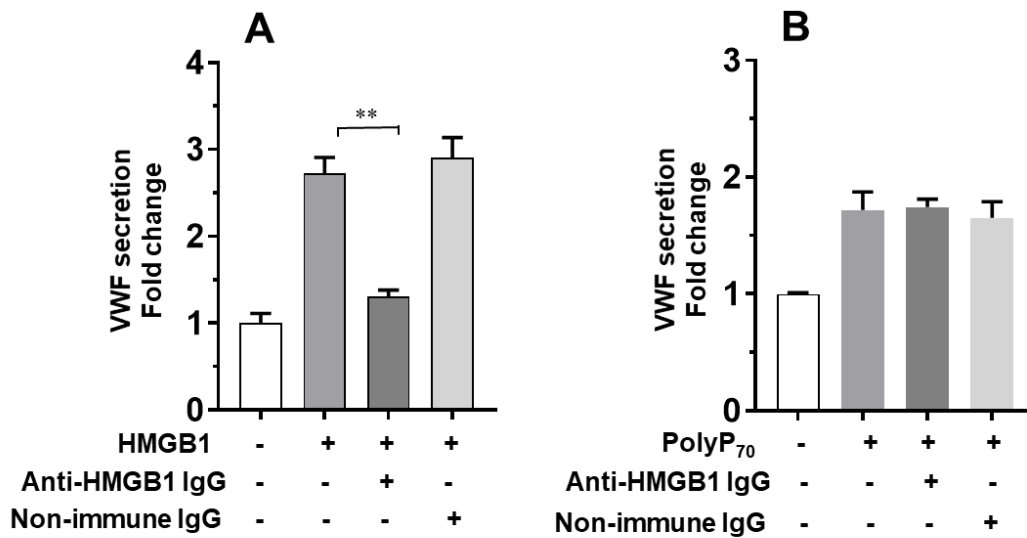

**Figure IS- Analysis of polyP<sub>70</sub>-mediated VWF release by EA.hy926 cells in the absence and presence of an anti-HMGB1 neutralizing antibody.** EA.hy926 cells were pretreated with anti-HMGB1 monoclonal antibody (10 μg/mL) or non-immune IgG (10 μg/mL) for 30 min followed by treatment with (A) HMGB1 (40 nM) for 16h. HMGB1-induced VWF release was measured using a Sandwich ELISA as described in Materials and methods. (B) The same as (A) except that cells were pretreated with anti-HMGB1 monoclonal antibody (10 μg/mL) or non-immune IgG (10 μg/mL) for 30 min followed by treatment with polyP<sub>70</sub> (50 μM) for 16h. polyP<sub>70</sub>-induced VWF release was measured using a Sandwich ELISA as described in Materials and methods. All results are shown as means ± SD of three independent experiments. Statistical significance was analyzed by one way ANOVA with Bonferroni post test. \*\*p<0.01.

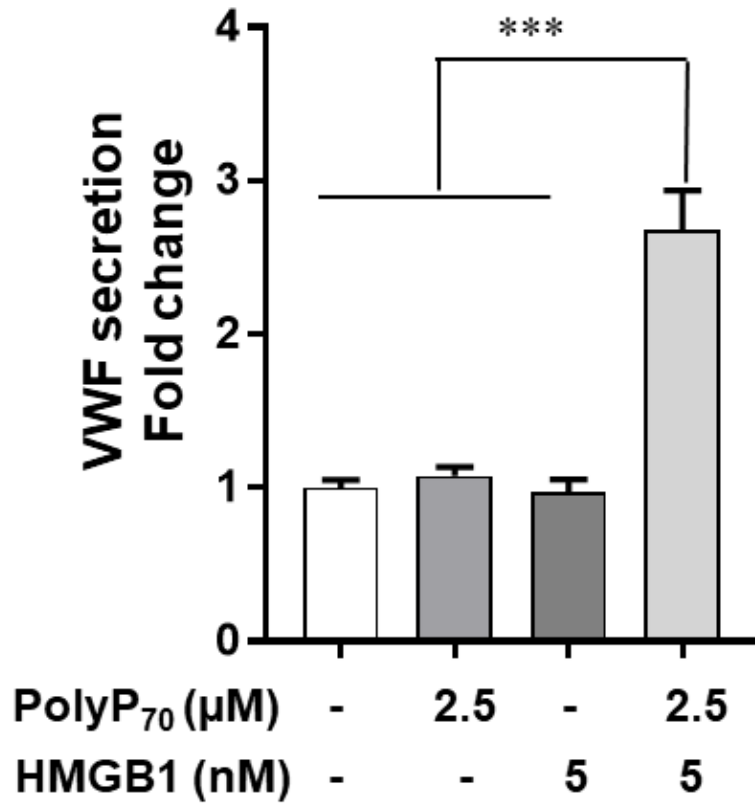

**Figure IIS- VWF measurement by Sandwich ELISA-** Primary human umbilical vein endothelial cells (HUVECs, Invitrogen) were treated with polyP<sub>70</sub> (2.5 μM, 4h) HMGB1 (2.5 nM, 16h) or with their combination (16h) and VWF release was measured using a Sandwich ELISA as described under Materials and methods. All results are shown as means ± SD of three independent experiments. Statistical significance was analyzed by one way ANOVA with Bonferroni post test. \*\*\*p<0.005.
